# Supplementary material
Source: PubMed Central journal article supplement (PMC4935607)
Supplement: NIHMS791548-supplement-1.pdf [file NIHMS791548-supplement-1.pdf]

**Supplemental Table 1.** miRNAs expression in GFP<sup>+</sup> FOXP3<sup>+</sup> and GFP<sup>-</sup> FOXP3<sup>-</sup> CD4<sup>+</sup> T cells in 2~3 or 7~8 month-old *Pbx1-d Tg* and B6.*Sle1a1* relative to B6 mice (N = 3-4 mice per group).

|                 | <i>Pbx1-d Tg</i>               |                                |                                |                | <i>Sle1a1</i>                  |                                |                                |                |
|-----------------|--------------------------------|--------------------------------|--------------------------------|----------------|--------------------------------|--------------------------------|--------------------------------|----------------|
|                 | Young                          |                                | Old                            |                | Young                          |                                | Old                            |                |
|                 | GFP (+)                        | GFP(-)                         | GFP (+)                        | GFP(-)         | GFP (+)                        | GFP(-)                         | GFP (+)                        | GFP(-)         |
| <b>miR-17</b>   | 1.88<br>± 0.45                 | 0.88<br>± 0.24                 | 1.58<br>± 0.30                 | 1.09<br>± 0.49 | * <b>11.3</b><br>± <b>9.11</b> | 0.63<br>± 0.30                 | 1.59<br>± 0.50                 | 0.87<br>± 0.23 |
| <b>miR-19a</b>  | 1.42<br>± 0.37                 | 0.93<br>± 0.28                 | 1.14<br>± 0.27                 | 0.77<br>± 0.31 | * <b>3.75</b><br>± <b>1.25</b> | 0.70<br>± 0.41                 | * <b>1.64</b><br>± <b>0.30</b> | 0.90<br>± 0.27 |
| <b>miR-19b</b>  | 1.30<br>± 0.28                 | 0.99<br>± 0.17                 | 1.23<br>± 0.16                 | 1.00<br>± 0.49 | * <b>2.93</b><br>± <b>0.91</b> | 0.67<br>± 0.52                 | * <b>1.86</b><br>± <b>0.23</b> | 0.78<br>± 0.23 |
| <b>miR-20a</b>  | 1.16<br>± 0.28                 | 0.85<br>± 0.26                 | 3.61<br>± 2.16                 | 1.37<br>± 0.44 | * <b>6.80</b><br>± <b>4.78</b> | 0.70<br>± 0.41                 | * <b>2.16</b><br>± <b>0.34</b> | 0.89<br>± 0.14 |
| <b>miR-92</b>   | 1.24<br>± 0.18                 | 1.00<br>± 0.15                 | 2.90<br>± 1.59                 | 1.01<br>± 0.22 | * <b>3.46</b><br>± <b>1.66</b> | 0.58<br>± 0.19                 | * <b>1.60</b><br>± <b>0.14</b> | 1.08<br>± 0.36 |
| <b>miR-181a</b> | 1.59<br>± 0.43                 | * <b>1.45</b><br>± <b>0.10</b> | * <b>0.65</b><br>± <b>0.08</b> | 2.31<br>± 1.66 | * <b>2.22</b><br>± <b>0.30</b> | 1.60<br>± 0.55                 | 0.74<br>± 0.26                 | 2.50<br>± 1.30 |
| <b>miR-181b</b> | * <b>1.94</b><br>± <b>0.33</b> | 1.45<br>± 0.17                 | * <b>0.77</b><br>± <b>0.04</b> | 2.01<br>± 1.23 | * <b>1.61</b><br>± <b>0.29</b> | * <b>1.73</b><br>± <b>0.47</b> | 0.81<br>± 0.22                 | 2.40<br>± 1.16 |

\*p < 0.05

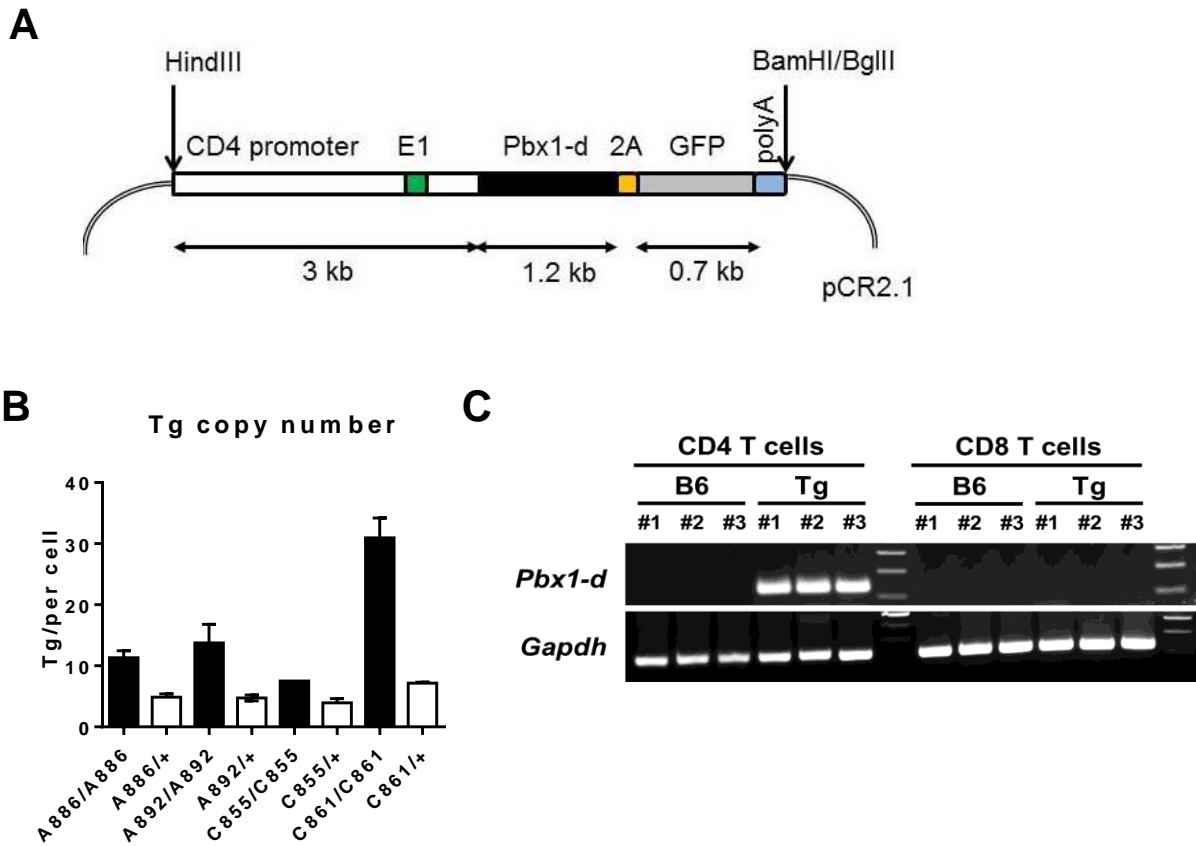

**Supplemental Figure 1. Production of *Pbx1-d* Tg mice.** **A.** Tg construct. **B.** Tg copy number calculated for each of the 4 hemizygous and homozygous lines (n = 4) using a *Pbx1-d* Taqman probe and a *Pbx1-d* plasmid standard curve. **C.** *Pbx1-d* message expression in splenic CD4<sup>+</sup> and CD8<sup>+</sup> T cells isolated from B6 and A886 *Pbx1-d* Tg mice with *Gapdh* shown as control (n = 3).

**A**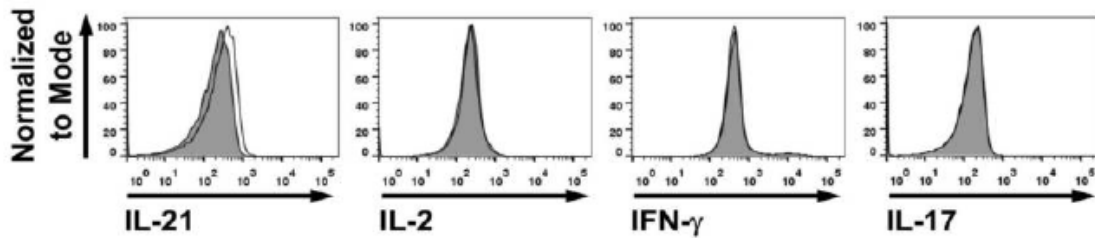**B**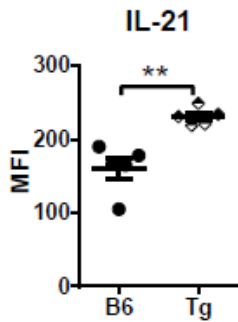**C**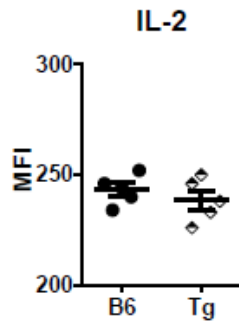**D**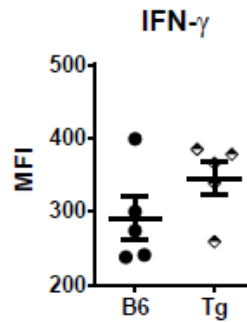**E**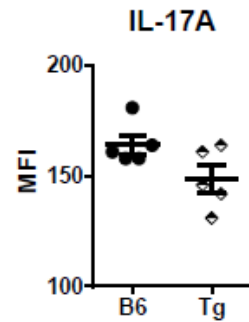**F**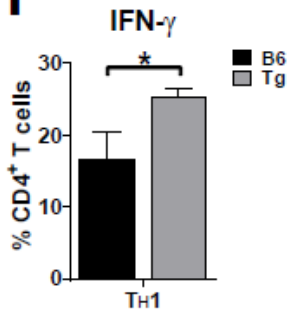**G**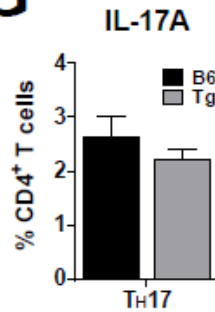

**Supplemental Figure 2. Cytokine production by *Pbx1-d* Tg CD4<sup>+</sup> T cells.** Intracellular staining of CD4<sup>+</sup> T cells isolated from the spleens of 2 month-old B6 (grey filled histograms) and *Pbx1-d* Tg (open histograms) mice and stimulated with PMA and ionomycin. Representative histograms (**A**) and mean fluorescence intensity (MFI) each of the cytokines (**B-E**). Each symbol represents a mouse. Intracellular IFN $\gamma$  (**F**) and IL-17A (**G**) in B6 and *Pbx1-d* Tg CD4<sup>+</sup> T cells polarized under T<sub>H</sub>1 and T<sub>H</sub>17 conditions, respectively (n = 3). \*\*  $P < 0.01$ .

## Supplemental Figure 3

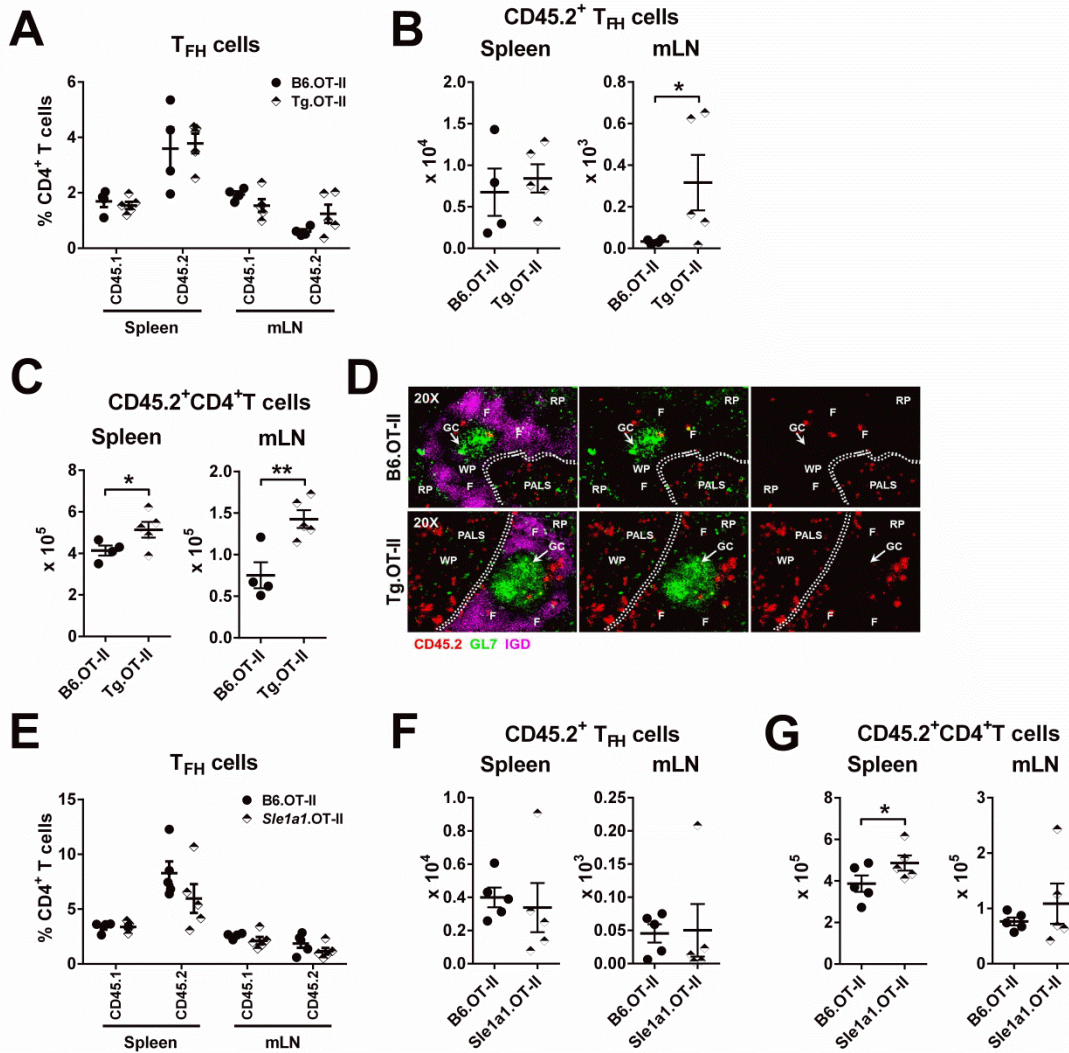

**Supplemental Figure 3. Expansion of Pbx1-d.OT-II and Sle1a1.OT-II T cells 7 days after OVA immunization.** **A.** Percentages of CD45.2<sup>+</sup> donor B6.OT-II or *Pbx1-d* Tg.OT-II cells and CD45.1<sup>+</sup> recipient T<sub>HH</sub> cells. **B.** Numbers of CD45.2<sup>+</sup> donor B6.OT-II or *Pbx1-d* Tg.OT-II T<sub>HH</sub> cells. **C.** Numbers of total CD45.2<sup>+</sup> donor B6.OT-II or *Pbx1-d* Tg.OT-II T cells. **D.** Representative 20x spleen sections of B6.OT-II or *Pbx1-d* Tg.OT-II cell recipients, as in Fig. 4D. **E.** Percentages of CD45.2<sup>+</sup> donor B6.OT-II or *Sle1a1*.OT-II cells and CD45.1<sup>+</sup> recipient T<sub>HH</sub> cells. **F.** Numbers of CD45.2<sup>+</sup> donor B6.OT-II or *Sle1a1*.OT-II T<sub>HH</sub> cells. **G.** Numbers of total CD45.2<sup>+</sup> donor B6.OT-II or *Sle1a1*.OT-II T cells. \**P* < 0.05, \*\**P* < 0.01.
